# Supplementary material for: Arabidopsis SFAR4 is a novel GDSL-type esterase involved in fatty acid degradation and glucose tolerance
Source: PubMed Central journal article supplement (PMC5432905; doi:10.1186/s40529-015-0114-6), 2015-12-01
Supplement: 40529_2015_114_MOESM2_ESM.pdf [file 40529_2015_114_MOESM2_ESM.pdf]

(A)

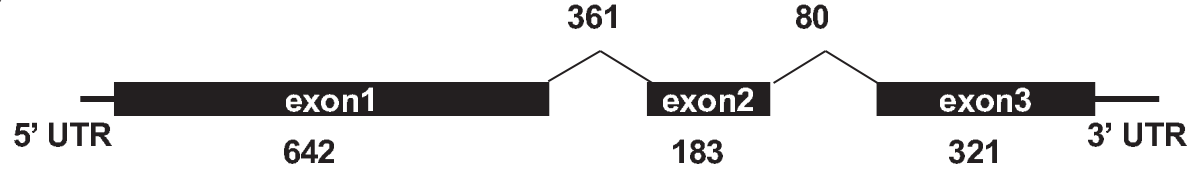

(B)

MSSSISPLLTTAISVAILLFSTISTAATIPNIHRPFNKIYAFGDS\*F TDTGNSRSGEGPAG-60  
Signal peptide Block I  
FGHLSSPPYGMTFFRRPTNRYSDGRLTIDFVAESMNLPFLPPYLSLKT TNANGTATDTHG-120  
Block II  
VNFAVSGSTVIKHAFFVKNLSLDMTPQSIETELAWFEKYLETLGTNQKVS LFKDSLFWI-180  
GEIGVND<sup>\*</sup>YAYTLGSTVSSDTIRELSISTFTRFLETLLNKGVKYMLVQGHPATGCLTLAMS-240  
Block III Block IV  
LAAEDDRDSLGCVQSANNQSYTHNLALQSKLKQLRIKYP SATIVYADYWNAYRAVIKHPS-300  
KYGITEKFKACCGIGEPYNFQVFQTCGTDAATVCKDPNQYINWDGV<sup>\*</sup>HLTEAMYKVMADMF-360  
Block V  
LDGTFTRPRFSDLLIKKLNYL-381

**Supplementary Figure S1.** The genomic organization of *SFAR4*, and primary sequence and structure for SFAR4 protein. (A) Genomic organization of the *SFAR4* gene. (B) Protein sequence of SFAR4 deduced from the cDNA sequence. GDSL motif is indicated by the square. Catalytic triad sites Ser45, Asp187, and His347 are indicated by asterisks.
