# Supplementary material for: Arabidopsis SFAR4 is a novel GDSL-type esterase involved in fatty acid degradation and glucose tolerance
Source: PubMed Central journal article supplement (PMC5432905; doi:10.1186/s40529-015-0114-6), 2015-12-01
Supplement: 40529_2015_114_MOESM3_ESM.pdf [file 40529_2015_114_MOESM3_ESM.pdf]

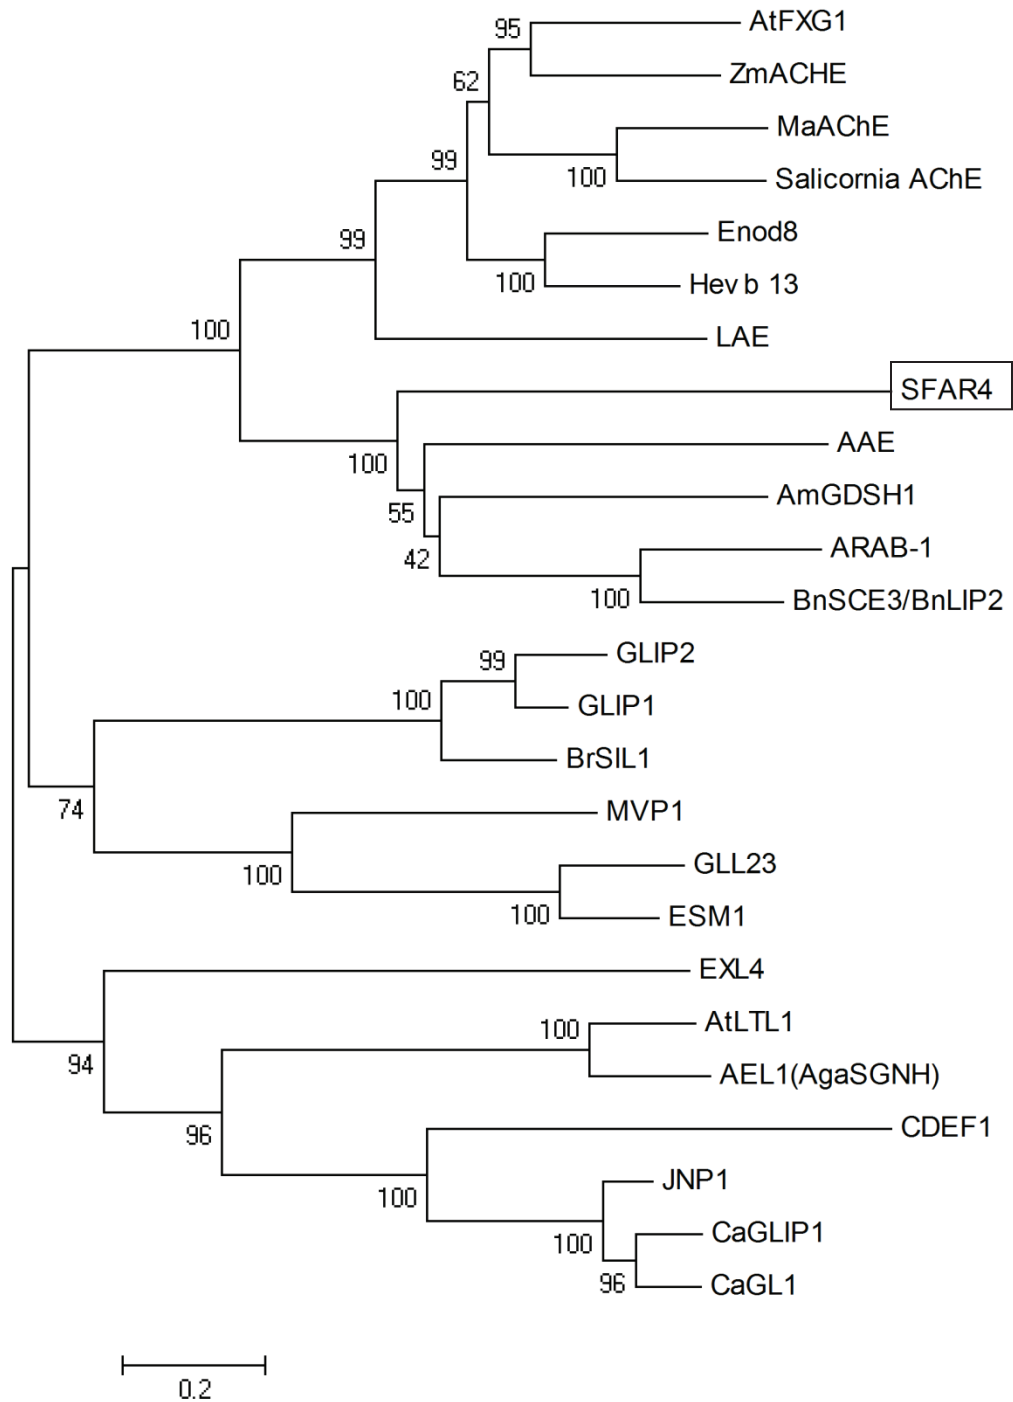

**Supplementary Figure S2.** Phylogenetic analysis of SFAR4 protein sequence and 24 plant GDSL lipase/esterases elucidated by Mega 4.0 with ClustalW and the NJ method with 1,000 bootstrap replicates. The nodes with less than 50% bootstrap support are not reported.
