# Supplementary material for: Arabidopsis SFAR4 is a novel GDSL-type esterase involved in fatty acid degradation and glucose tolerance
Source: PubMed Central journal article supplement (PMC5432905; doi:10.1186/s40529-015-0114-6), 2015-12-01
Supplement: 40529_2015_114_MOESM4_ESM.pdf [file 40529_2015_114_MOESM4_ESM.pdf]

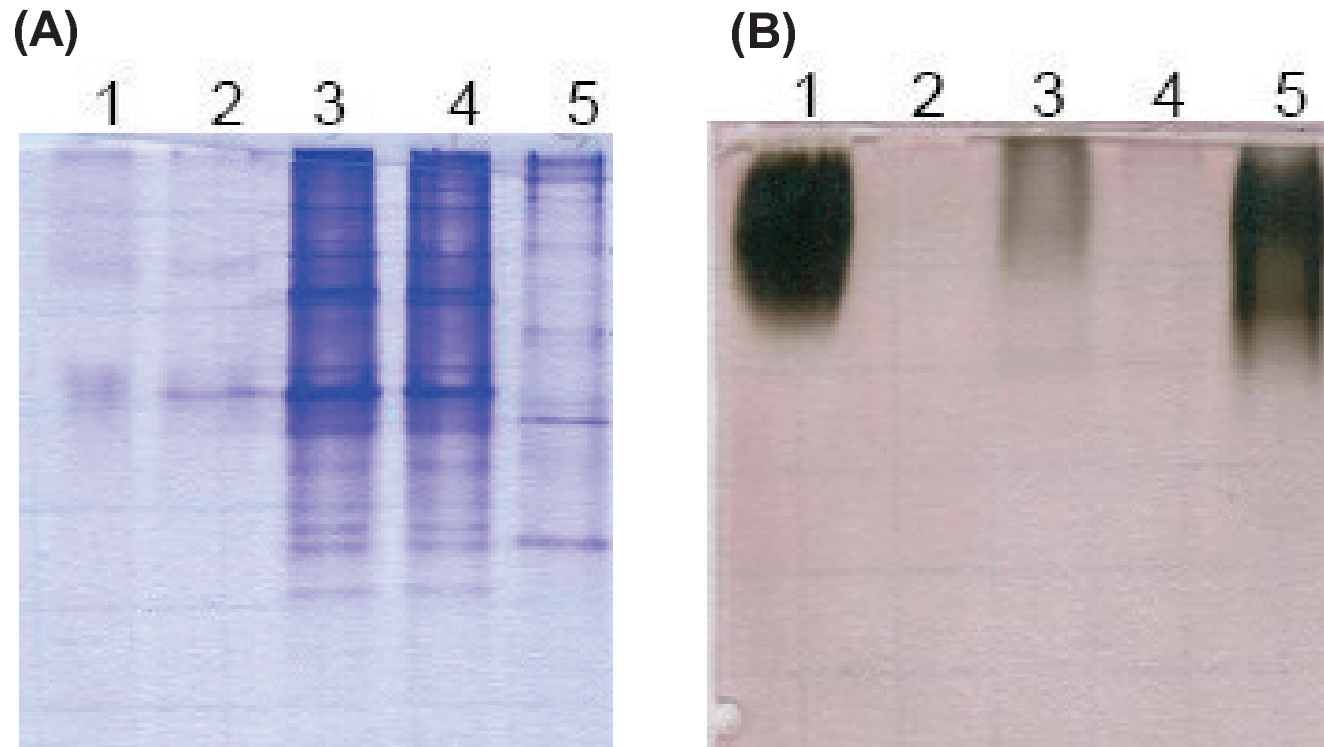

**Supplementary Figure S3.** The enzyme activity assay of recombinant SFAR4 proteins. (A) Recombinant SFAR4 proteins were expressed in *Pichia pastoris* (SMD1168). Secreted proteins were purified and separated by native PAGE and stained with Coomassie Blue. (B) The enzyme activity was determined by  $\alpha$ -naphthyl butyrate. Lanes 1, 3, and 5 are the SFAR4 transformants. Lanes 2 and 4 are vector controls. Lanes 1 and 2 are the unconcentrated culture medium (20  $\mu$ L/lane), while lanes 3 and 4 are concentrated solutions from the culture medium (10  $\mu$ g/lane). Lane 5 shows purified recombinant SFAR4 proteins purified with HisTrap Ni Sepharose column from the concentrated solution (1  $\mu$ g/lane).
