# Supplementary material for: Arabidopsis SFAR4 is a novel GDSL-type esterase involved in fatty acid degradation and glucose tolerance
Source: PubMed Central journal article supplement (PMC5432905; doi:10.1186/s40529-015-0114-6), 2015-12-01
Supplement: 40529_2015_114_MOESM6_ESM.pdf [file 40529_2015_114_MOESM6_ESM.pdf]

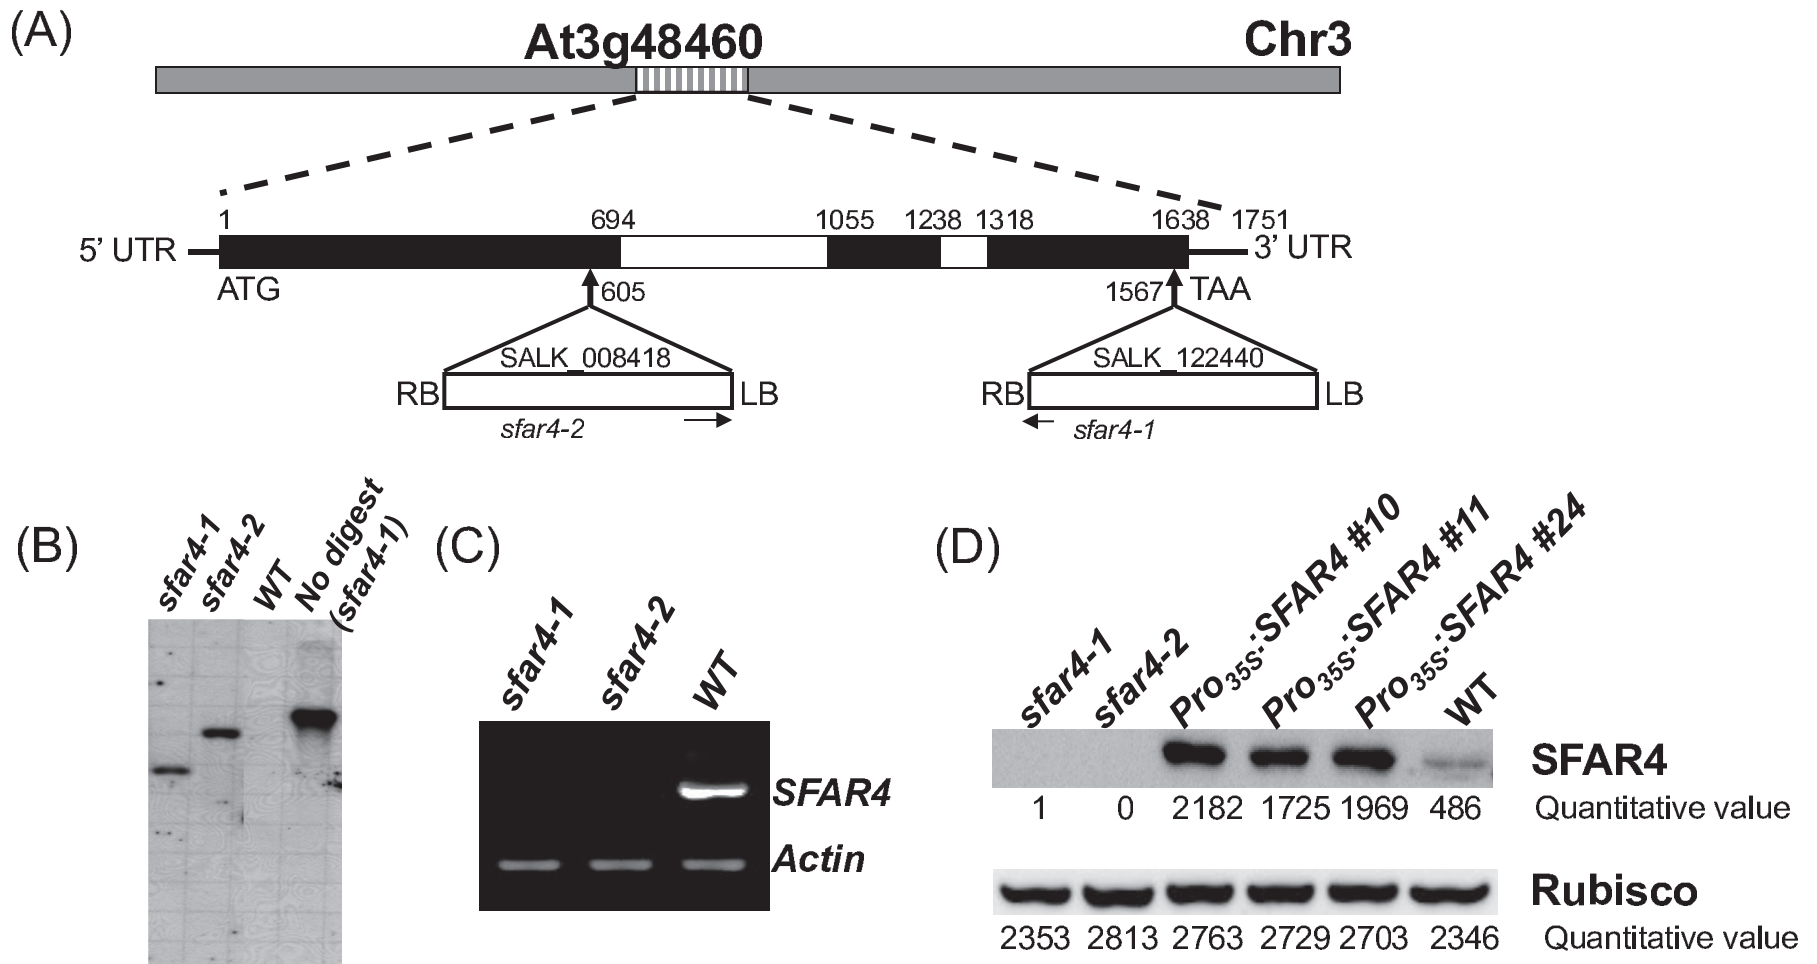

**Supplementary Figure S5.** Genotype analysis of *SFAR4* transgenic plants. (A) Genomic organization of *SFAR4* and location of the T-DNA insertion in *sfar4-1* and *sfar4-2*. The arrows indicate the positions of the T-DNA insertions (triangles). Genomic DNA of *SFAR4* is represented by 5'UTR, exons (black), introns (white) and 3'UTR. The T-DNA orientation of the left borders (LB) is indicated by the arrow. Chr3 refers to chromosome 3. (B) Southern blot analysis of the T-DNA insertion numbers in Col-0 and *sfar4* mutants. The genomic DNA was digested with *Hind*III, and the blot was probed with the T-DNA-specific DNA. (C) RNA analysis of *SFAR4* gene expression in *sfar4-1*, *sfar4-2*, and Col-0. *SFAR4* transcript expression was analyzed by RT-PCR. Total RNA (0.08  $\mu$ g) was used to detect *SFAR4* and *Actin1* (loading control) expression. (D) *SFAR4* proteins were detected by western blot with specific anti-*SFAR4* antibody. *RuBisCO* was used as a loading control. The quantitative values were tested by Image J free software to analyze and quantify the intensity bands in western blot result images.
